# Supplementary material for: New shoots from old roots: multiple stimuli-responsive properties of a common tetraphenylethene derivative
Source: Royal Society of Chemistry journal article supplement (doi:10.1039/d1qm01311d), 2021-11-29
Supplement: d1qm01311d1.pdf [file d1qm01311d1.pdf]

## Instruments and methods

<sup>1</sup>H NMR spectra were recorded on a VNMRS 400 NMR spectrometer (Varian, USA). High resolution mass spectra (HR-MS) were recorded using an Autoflex III mass spectrometer (MALDI-TOF-MS, Bruker, Germany). TGA analysis was performed on a NETZSCH SA409PC thermogravimeter. DSC measurements were carried out on a NETZSCH DSC 200F3 instrument at a heating rate and a cooling rate of 10 °C min<sup>-1</sup> in nitrogen. UV-Vis spectra were recorded using a UV-2600 spectrometer (Shimadzu, Japan). Fluorescence spectra were recorded using a F-7000 fluorescence spectrometer (Hitachi, Japan). Absolute quantum efficiency was measured on an integrating sphere (C11347-11, Hamamatsu, Japan). Fluorescence lifetime was measured on a compact fluorescence lifetime spectrometer (C11367-11, Hamamatsu, Japan). Powder X-ray diffraction (PXRD) patterns were carried out in the reflection mode at room temperature using a 2.2 kW Empyrean X-ray Diffraction System (PANalytical, Netherland). The ML spectra were collected from a spectrometer of Acton SP2750 with a liquid-nitrogen-cooled CCD (SPEC-10, Princeton) as a power detector (data-collection time is 1s and the diameter of optical fiber is 600 μm). The theoretical ground-state geometry and electronic structure of molecule was optimized using the density functional theory (DFT) with B3LYP hybrid functional at the basis set level of 6-31+G(d). All the theoretical calculations were performed using Gaussian 03 package.<sup>1</sup>

*Preparation of 1.*<sup>2</sup> 1-(4-Bromophenyl)-1,2,2-triphenylethylene (1 g, 2.43 mmol) was firstly placed in a 50 mL round bottom flask. The flask was evacuated under vacuum and flushed with nitrogen three times. THF (20 mL) was then added. The mixture was cooled to -78 °C and n-BuLi (2.5 M, 1.17 mL, 2.92 mmol) was slowly added. After the mixture was stirred for 3 h at -78 °C, trimethyl borate (542 μL, 4.86 mmol) was injected. After 3 h, the mixture was slowly warmed to room temperature. HCl (2 M, 10 mL) solution was added and the mixture was stirred for another 3 h. Then the reaction mixture was diluted with CH<sub>2</sub>Cl<sub>2</sub>, washed with water and brine, dried over Na<sub>2</sub>SO<sub>4</sub>. The solvents were removed under reduced pressure. The residue was purified

by chromatography on a silica gel column (DCM/EtOAc = 4/1, v/v) to yield the compound **1** (383 mg, 42.1%) as white powder.  $^1\text{H}$  NMR (400 MHz, DMSO- $d_6$ ):  $\delta$  = 7.94 (s, 2H), 7.53 (d,  $J$  = 8.0 Hz, 2H), 7.07-7.16 (m, 9H), 6.92-6.99 ppm (m, 8H);  $^{13}\text{C}$  NMR (100 MHz, DMSO- $d_6$ ):  $\delta$  = 144.88, 143.18, 143.15, 140.67, 133.62, 130.65, 129.69, 127.83, 126.59, 126.56 ppm; element analysis calcd. (%) for  $\text{C}_{26}\text{H}_{21}\text{BO}_2$ : C 83.00; H 5.63; found: C 83.42; H 5.52.

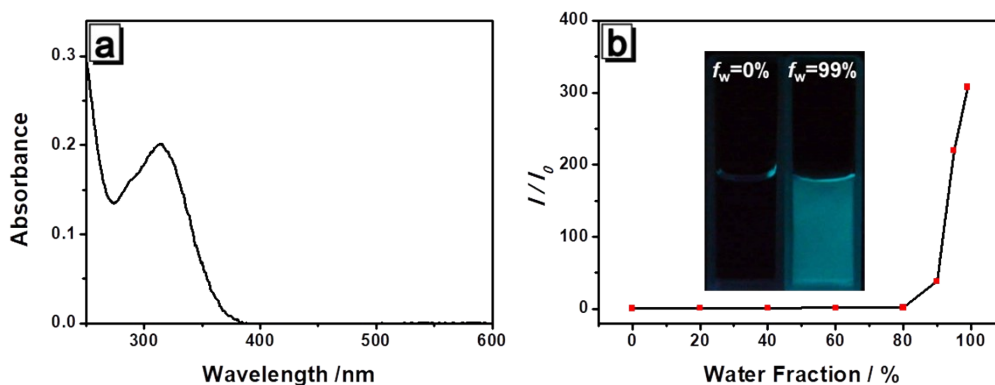

Figure S1. (a) Absorption of **1** in THF solution (10  $\mu\text{M}$ ). (b) Plots of  $I/I_0$  versus water fractions of **1**, where  $I_0$  is the emission intensity at 460 nm in THF (10  $\mu\text{M}$ ). Inset: fluorescence images at  $f_w = 0\%$  and 99%.

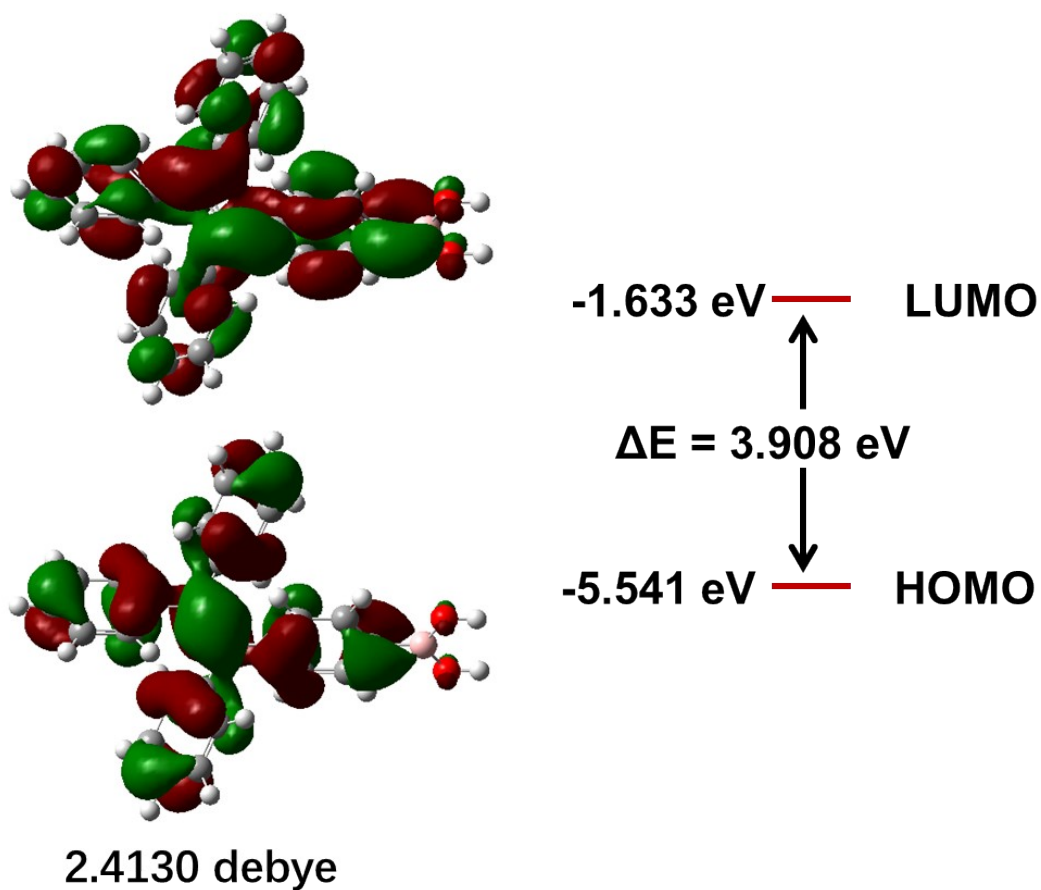

Figure S2. The HOMO and LUMO orbital distribution of **1** calculated by B3LYP/6-31+G(d).

Table S1. Optical properties of compound **1** in various solid forms.

|           | $\lambda_{em}[nm]^a$ | $\Phi_f[\%]^b$ | $\tau[ns]^c$   |
|-----------|----------------------|----------------|----------------|
| <b>1o</b> | 460                  | — <sup>d</sup> | — <sup>d</sup> |
| <b>1g</b> | 490                  | 50.9           | 3.323          |
| <b>1f</b> | 449                  | 48.1           | 2.545          |
| <b>1h</b> | 465                  | 52.0           | 3.038          |

<sup>a</sup>Emission maximum. <sup>b</sup>Fluorescence quantum yield determined by using a calibrated integrating sphere. <sup>c</sup>Fluorescence lifetime. <sup>d</sup>Not determined.

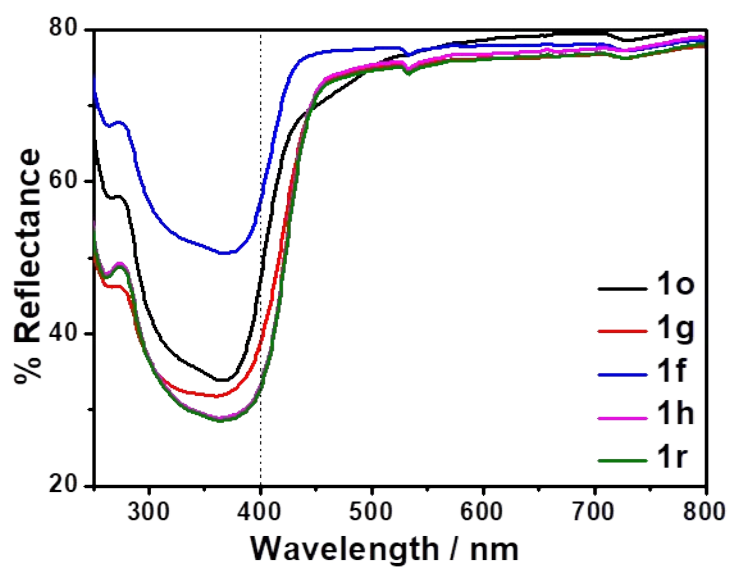

Figure S3. UV-Vis reflection spectra of different states of **1**.

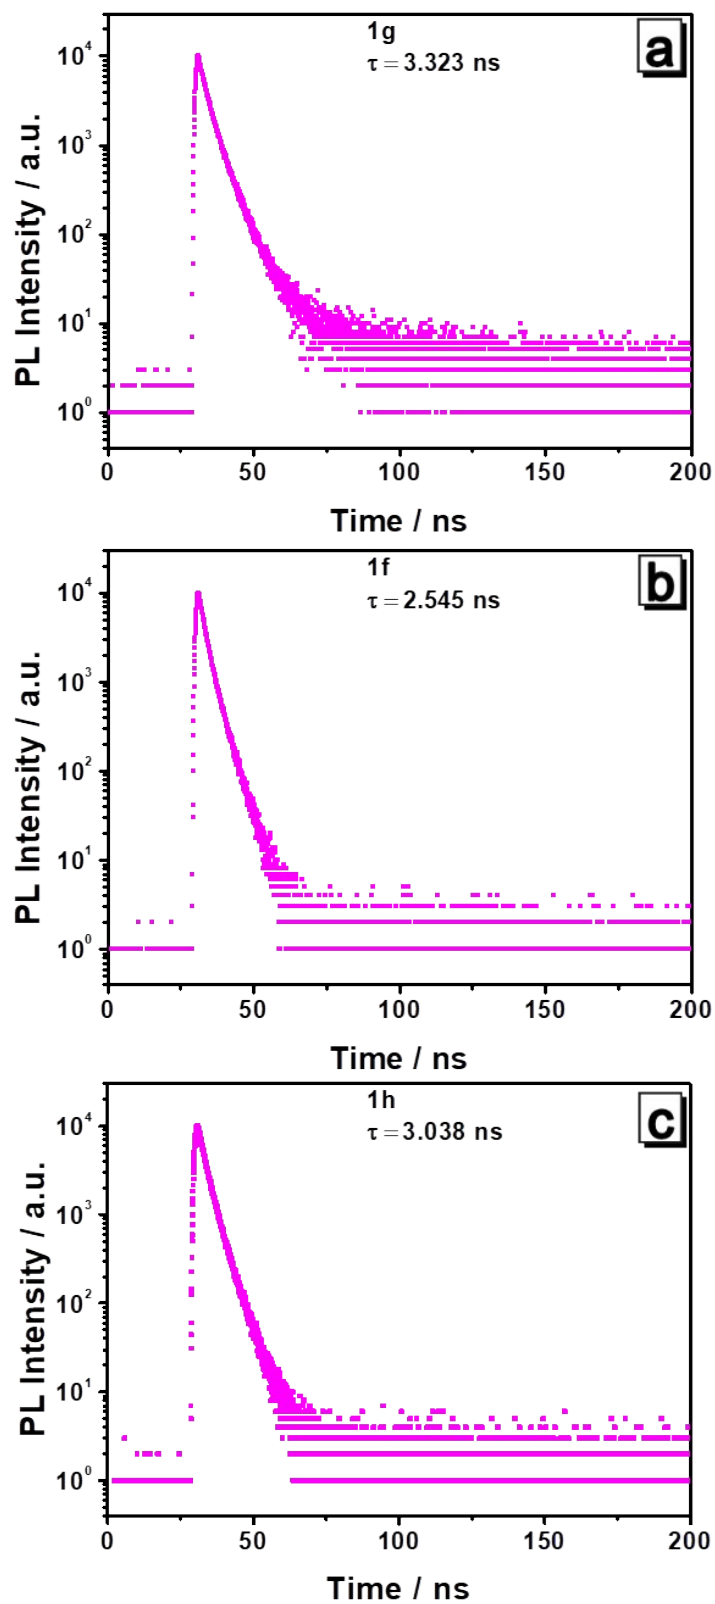

Figure S4. Fluorescence decay curves of ground powder (**1g**), fumed powder (**1f**) and heated powder (**1h**) of **1**.

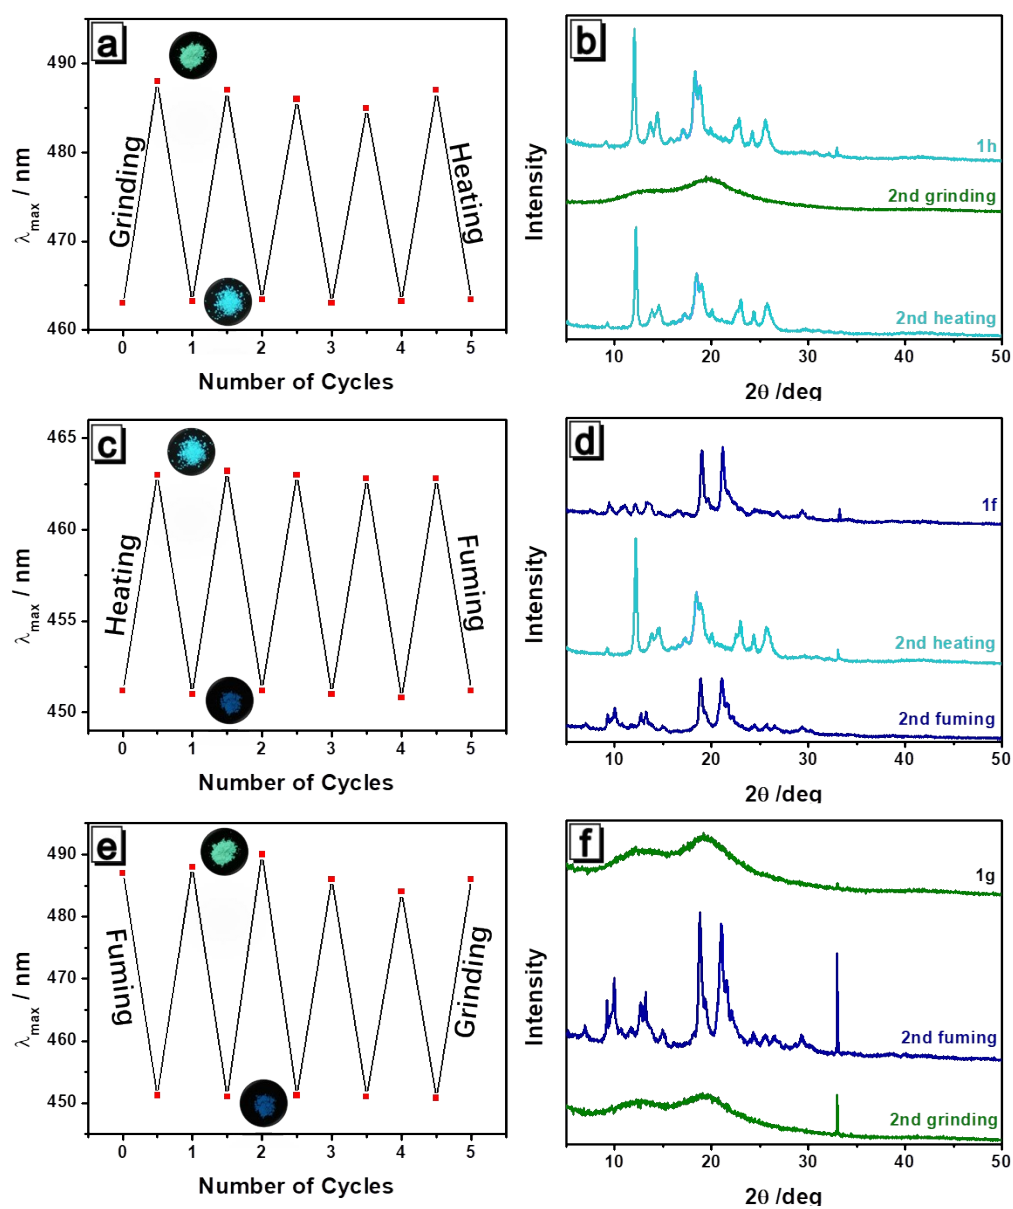

Figure S5. Maximum emission wavelength changes of **1** cast weighing paper versus (a) grinding/heating, (c) heating/methanol fuming and (e) methanol fuming /grinding cycles. PXRD patterns of **1** during (b) grinding/heating, (d) heating/methanol fuming and (f) methanol fuming /grinding cycles.

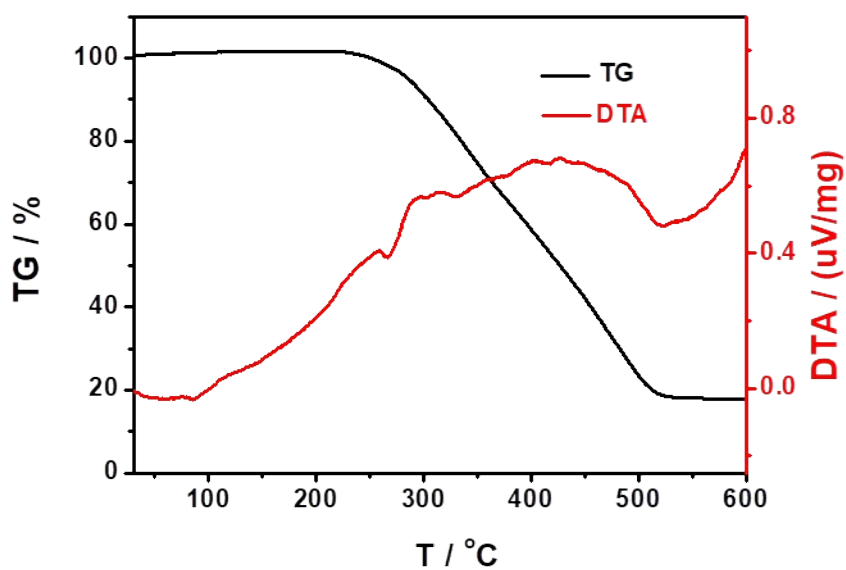

Figure S6. TG and DTA curves of **1** measured at a heating rate of 10  $^\circ\text{C}/\text{min}$  under nitrogen atmosphere.

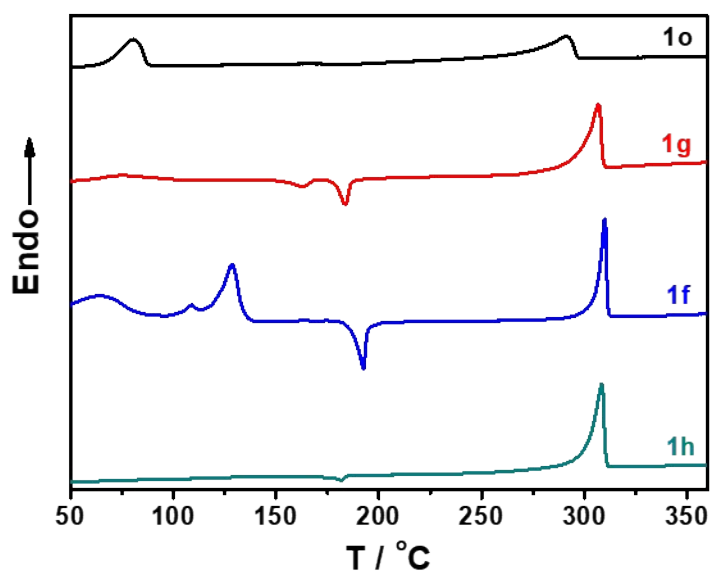

Figure S7. DSC curves of the as-prepared powder (**1o**), ground powder (**1g**), fumed powder (**1f**) and heated powder (**1h**).

Table S2. Single crystal data of **1c**.

|                                     |                           |
|-------------------------------------|---------------------------|
| CCDC number                         | 2084062                   |
| Formula                             | $C_{27.5}H_{24}BO_{2.75}$ |
| Formula weight /g•mol <sup>-1</sup> | 409.28                    |
| Crystal system                      | monoclinic                |
| Space group                         | C2/c                      |
| T/K                                 | 100                       |
| Z                                   | 16                        |
| a/Å                                 | 49.972(3)                 |
| b/Å                                 | 5.4225(3)                 |
| c/Å                                 | 36.9982(19)               |
| $\alpha/^\circ$                     | 90                        |
| $\beta/^\circ$                      | 110.411(3)                |
| $\gamma/^\circ$                     | 90                        |
| V/Å <sup>3</sup>                    | 9396.1(9)                 |
| $\rho_c/g\cdot cm^{-3}$             | 1.157                     |
| $\mu/mm^{-1}$                       | 0.573                     |
| F(000)                              | 3456.0                    |
| Reflections collected               | 80586                     |
| Independent reflections             | 8630                      |
| R <sub>int</sub>                    | 0.0704                    |
| R <sub>1</sub> (I > 2 $\sigma$ (I)) | 0.1059                    |
| wR <sub>2</sub>                     | 0.3177                    |
| GOOF                                | 1.050                     |



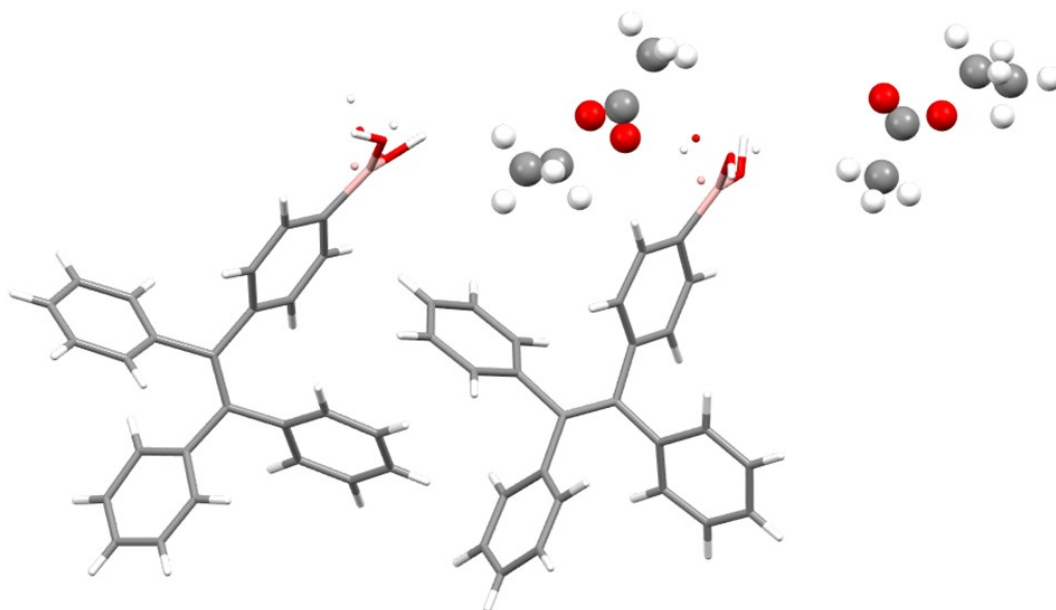

Figure S8. Two kinds of molecular conformations in single crystal **1c**. Every boric acid group in one molecule has two possible positions by virtue of disorder distribution.

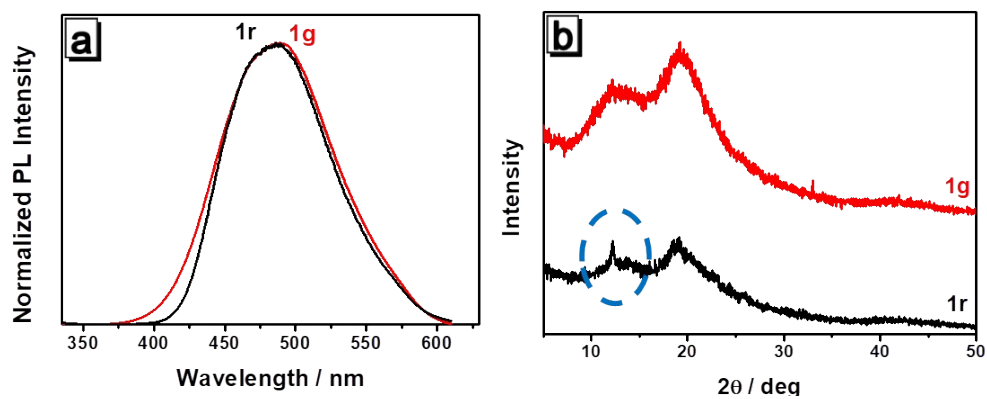

Figure S9. (a) Normalized fluorescence spectra and (b) PXRD patterns of **1g** and **1r**.

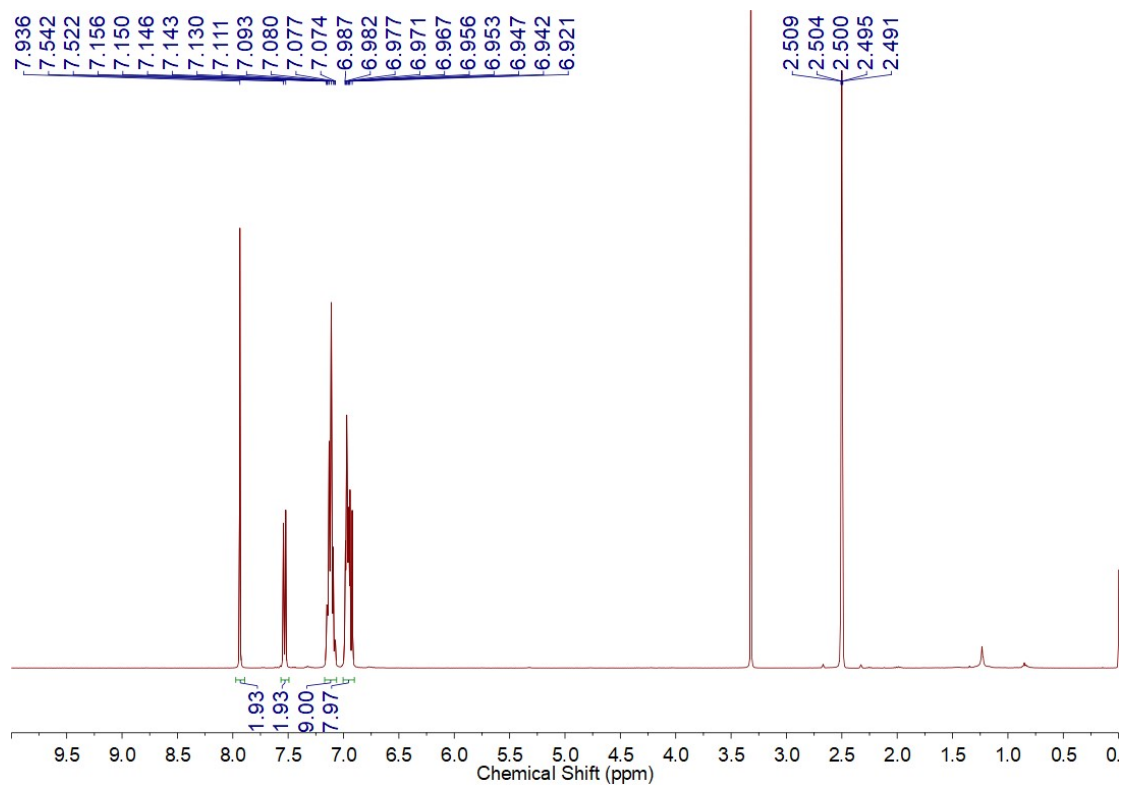

Figure S10.  $^1\text{H}$  NMR of compound **1**.

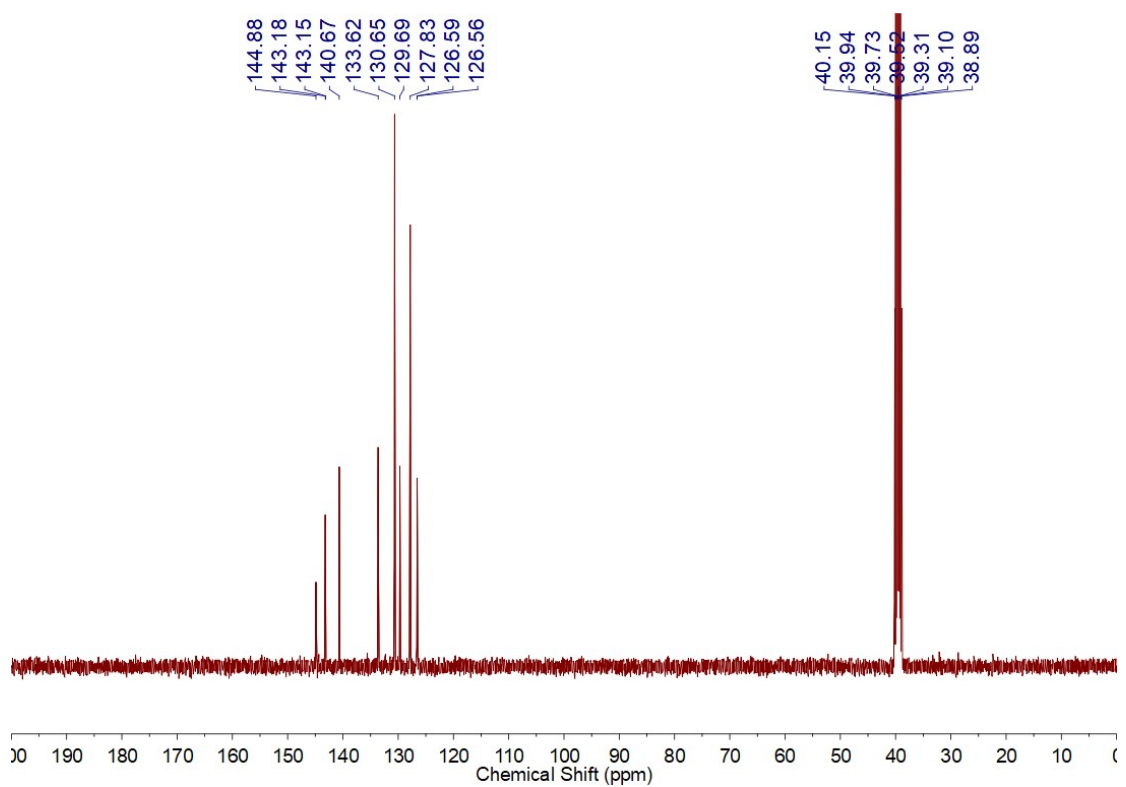

Figure S11.  $^{13}\text{C}$  NMR of compound **1**.

## Reference

1. Gaussian 03, Revision E.01, M. J. Frisch et al., Gaussian, Inc., Wallingford CT, 2009.
2. Yuan, W. Z.; Lu, P.; Chen, S.; Lam, J. W. Y.; Wang, Z.; Liu, Y.; Kwok, G. S.; Ma, Y.; Tang, B. Z. *Adv. Mater.* **2010**, *22*, 2159–2163.
